# Supplementary material
Source: publisher figshare collection journal article supplement (https://acs.figshare.com/ndownloader/files/25999737)
Supplement: Supplementary file 1 [file 25999737]

## Supporting Information

# Effects of Superparamagnetic Iron Nanoparticles on Electrocatalysts for the Reduction of Oxygen

Talha Al-Zoubi,<sup>†</sup> Wei Gao,<sup>†</sup> Charles E. Schulz,<sup>‡</sup> Duan Luo,<sup>#</sup> Angela M. DiAscro,<sup>‡</sup> Jianguo Wen,<sup>#</sup> Andrew A. Gewirth,<sup>‡</sup> and Hong Yang<sup>†,‡,\*</sup>

<sup>†</sup> Department of Chemical and Biomolecular Engineering, University of Illinois at Urbana-Champaign, 600 S. Mathews Avenue, Urbana, Illinois 61801, United States

<sup>‡</sup> Department of Physics, Knox College, 2 East South Street Galesburg, Illinois 61401, United States

<sup>#</sup> Center for Nanoscale Materials (CNM), Argonne National Laboratory, 9700 South Cass Avenue, Argonne, Illinois 60439, United States

<sup>‡</sup> Department of Chemistry, University of Illinois at Urbana-Champaign, 505 S. Mathews Avenue, Urbana, Illinois 61801, United States

\*: Corresponding author: [hy66@illinois.edu](mailto:hy66@illinois.edu)

## Figures

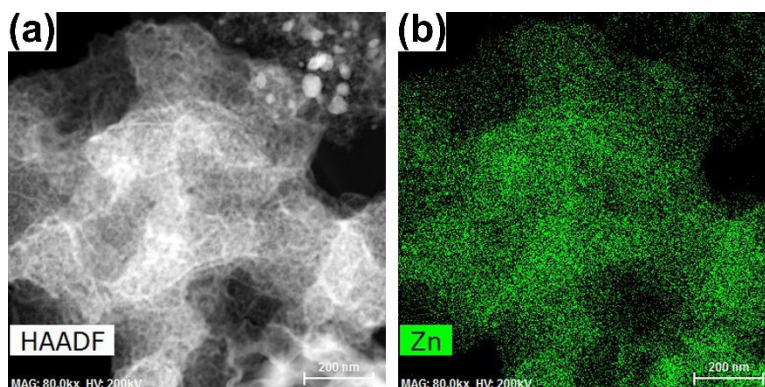

**Figure S1.** (a) Representative HAADF-STEM image (b) EDS map of the FeNC<sub>750</sub> samples showing the existence of remaining zinc after pyrolysis.

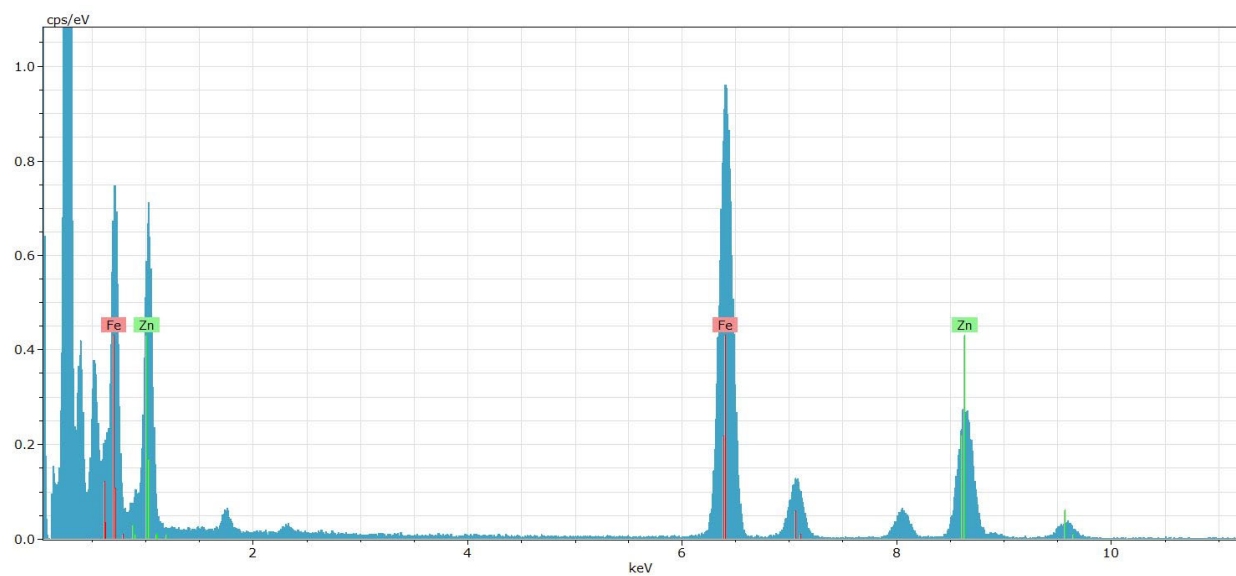

**Figure S2.** EDS spectrum showing the presence of Zn and Fe.

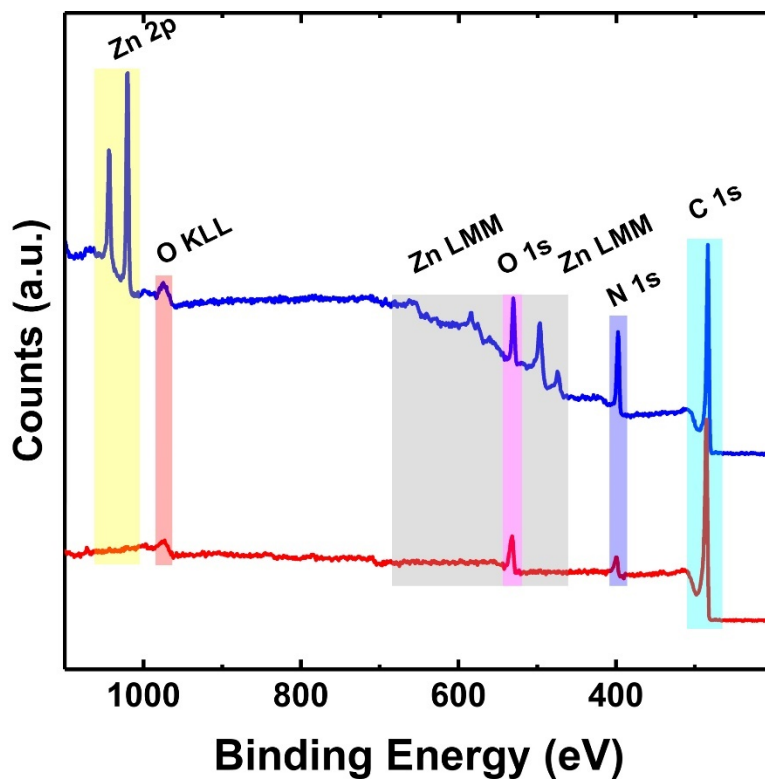

**Figure S3.** XPS survey scans for FeNC<sub>750</sub> (top, blue) and FeNC<sub>950</sub> (bottom, red) samples with regions of relevant elements being highlighted. The signals for zinc were clearly observable for the FeNC<sub>750</sub> sample, but absent from the FeNC<sub>950</sub> sample.

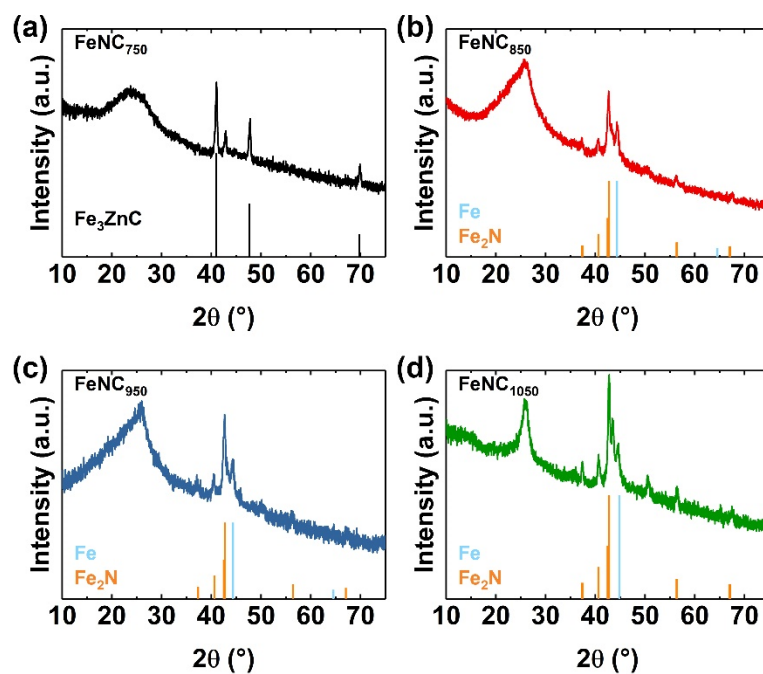

**Figure S4.** XRD patterns showing the formation of various Fe and N containing species in the as-made catalysts.

## Tables

**Table S1.** Iron and zinc contents in the Fe-N-C electrocatalysts determined by inductively coupled plasma mass spectrometry (ICP-MS)

|                            | Zn (wt. %) | Fe (wt. %) |
|----------------------------|------------|------------|
| <b>FeNC<sub>850</sub></b>  | 4.3        | 5.6        |
| <b>FeNC<sub>950</sub></b>  | 0.18       | 5.5        |
| <b>FeNC<sub>1050</sub></b> | 0.01       | 7.2        |

**Table S2.** Mössbauer spectroscopy results for the Fe-N-C electrocatalysts

| Sample               | Component |  | $\delta_{\text{iso}}$<br>(mm s <sup>-1</sup> ) | $\Delta E_Q$<br>(mm s <sup>-1</sup> ) | FWHM<br>(mm s <sup>-1</sup> ) | Assignment       |
|----------------------|-----------|--|------------------------------------------------|---------------------------------------|-------------------------------|------------------|
| FeNC <sub>850</sub>  | Doublet   |  | 0.37                                           | 0.97                                  | 0.60                          | FeN <sub>x</sub> |
|                      | Singlet   |  | -0.07                                          | -                                     | 0.26                          | $\alpha$ -Fe     |
| FeNC <sub>950</sub>  | Doublet   |  | 0.32                                           | 0.89                                  | 0.82                          | FeN <sub>x</sub> |
|                      | Singlet   |  | -0.1                                           | -                                     | 0.35                          | $\alpha$ -Fe     |
| FeNC <sub>1050</sub> | Doublet   |  | 0.22                                           | 0.96                                  | 0.34                          | FeN <sub>x</sub> |
|                      | Singlet   |  | -0.07                                          | -                                     | 0.35                          | $\alpha$ -Fe     |
